# Supplementary material for: Facile synthesis of a three-dimensional Ln-MOF@FCNT composite for the fabrication of a symmetric supercapacitor device with ultra-high energy density: overcoming the energy storage barrier
Source: Royal Society of Chemistry journal article supplement (doi:10.1039/d4dt00136b), 2024-01-01
Supplement: d4dt00136b1.pdf [file d4dt00136b1.pdf]

## Electronic Supplementary Materials

### Facile synthesis of three-dimensional Ln-MOF@FCNT composite for the fabrication of a symmetric supercapacitor device with ultra-high energy density: Delimiting the energy storage barrier

Mohammad Yasir Khan<sup>a†</sup>, Ahmad Husain<sup>b†</sup>, Dhiraj K. Mahajan<sup>b</sup>, Mohammad Muaz<sup>c</sup>, M. Shahid<sup>a\*</sup>, Mohd Zeeshan<sup>a</sup>, Farasha Sama<sup>d</sup>, Sharique Ahmad<sup>e</sup>

<sup>a</sup>Functional Inorganic Materials Lab (FIML), Department of Chemistry, Aligarh Muslim University, Aligarh 202002, India.

<sup>b</sup>Department of Mechanical Engineering, Indian Institute of Technology Ropar, Rupnagar, Punjab 140001, India

<sup>c</sup>Interdisciplinary Nanotechnology Center, Aligarh Muslim University, Aligarh 202002, India.

<sup>d</sup>Department of Industrial Chemistry, Aligarh Muslim University, Aligarh 202002, India.

<sup>e</sup>Applied Science and Humanities Section, University Polytechnic, Aligarh Muslim University, Aligarh 202002, India.

\*Corresponding author, E-mail: [shahid81chem@gmail.com](mailto:shahid81chem@gmail.com) (M. Shahid)

†These authors contributed equally.

**Table S1.** Selected bond lengths (Å) and bond angles (degree) for **YK-1**

|                  |            |
|------------------|------------|
| <b>Pr1 O2</b>    | 2.483(4)   |
| <b>Pr1 O4</b>    | 2.433(4)   |
| <b>Pr1 O1</b>    | 2.382(4)   |
| <b>Pr1 N1</b>    | 2.650(4)   |
| <b>O2 C1</b>     | 1.245(6)   |
| <b>O4 C7</b>     | 1.266(7)   |
| <b>O1 C1</b>     | 1.236(6)   |
| <b>N1 C3</b>     | 1.334(7)   |
| <b>N1 C4</b>     | 1.310(7)   |
| <b>C1 C2</b>     | 1.514(7)   |
| <b>C3 C2</b>     | 1.369(7)   |
| <b>C2 C6</b>     | 1.352(10)  |
| <b>C4 C7</b>     | 1.520(9)   |
| <b>C4 C5</b>     | 1.371(10)  |
| <b>C7 O3</b>     | 1.222(8)   |
| <b>C6 C5</b>     | 1.390(11)  |
| <b>N2 C8</b>     | 1.438(10)  |
| <b>O2 Pr1 O2</b> | 126.31(19) |
| <b>O4 Pr1 O2</b> | 132.03(12) |
| <b>O4 Pr1 O2</b> | 87.18(14)  |

|                  |            |
|------------------|------------|
| <b>O4 Pr1 O4</b> | 93.25(19)  |
| <b>O1 Pr1 O2</b> | 73.04(15)  |
| <b>O1 Pr1 O2</b> | 78.87(16)  |
| <b>O1 Pr1 O4</b> | 154.21(14) |
| <b>O1 Pr1 O4</b> | 80.62(14)  |
| <b>O1 Pr1 O1</b> | 115.1(2)   |
| <b>N1 Pr1 O2</b> | 72.25(12)  |
| <b>N1 Pr1 O2</b> | 144.19(15) |
| <b>N1 Pr1 O2</b> | 72.25(12)  |
| <b>N1 Pr1 O4</b> | 72.06(13)  |
| <b>N1 Pr1 O4</b> | 62.51(12)  |
| <b>N1 Pr1 O1</b> | 83.00(14)  |
| <b>N1 Pr1 O1</b> | 136.34(15) |
| <b>N1 Pr1 N1</b> | 111.85(17) |
| <b>C1 O2 Pr1</b> | 137.3(3)   |
| <b>C7 O4 Pr1</b> | 127.0(4)   |
| <b>C1 O1 Pr1</b> | 154.3(4)   |
| <b>C3 N1 Pr1</b> | 124.1(3)   |
| <b>C4 N1 Pr1</b> | 118.3(4)   |
| <b>C4 N1 C3</b>  | 117.1(5)   |
| <b>O1 C1 O2</b>  | 126.1(5)   |
| <b>C2 C1 O2</b>  | 116.7(5)   |
| <b>C2 C1 O1</b>  | 117.2(5)   |
| <b>C2 C3 N1</b>  | 125.2(5)   |
| <b>H3 C3 N1</b>  | 117.4(3)   |
| <b>C3 C2 C1</b>  | 121.0(5)   |
| <b>C6 C2 C1</b>  | 121.6(6)   |
| <b>C6 C2 C3</b>  | 117.4(6)   |
| <b>C7 C4 N1</b>  | 114.7(5)   |
| <b>C5 C4 N1</b>  | 121.6(6)   |

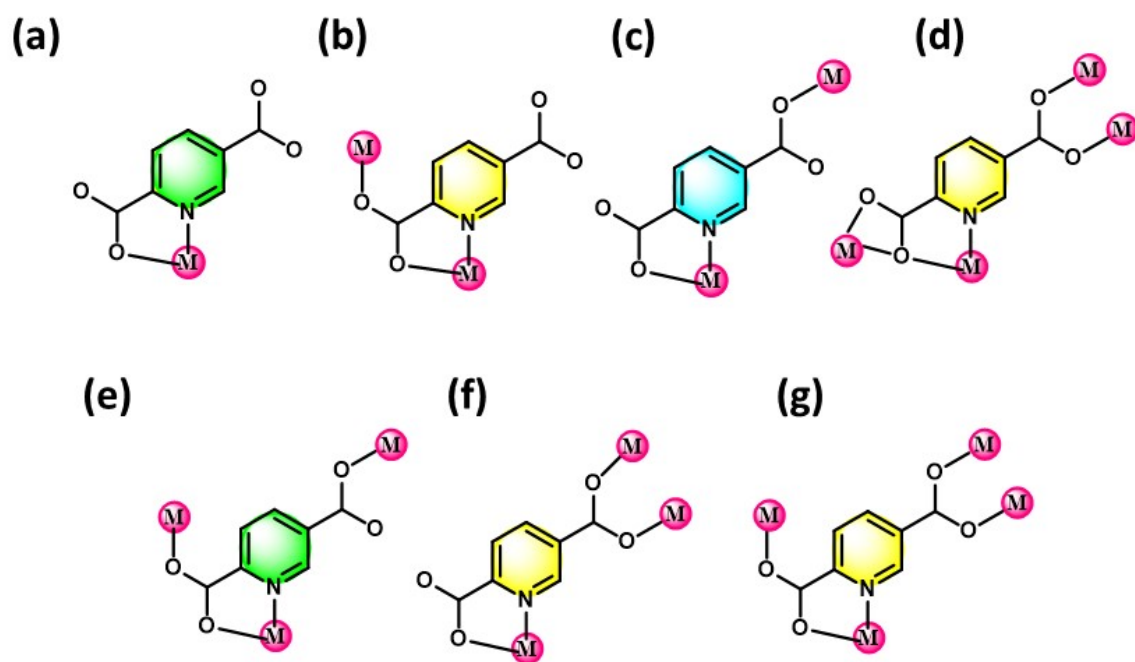

Fig. S1. Various coordination modes of pdc<sup>2-</sup> ligand.

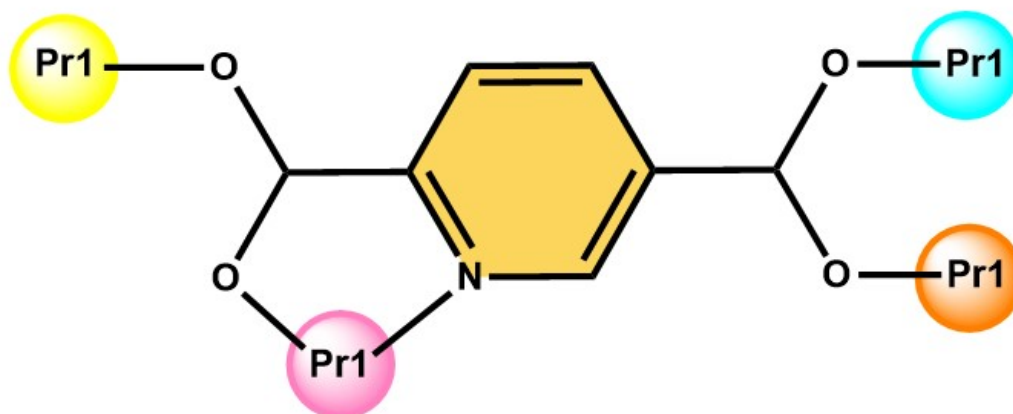

Fig. S2. Coordination mode of pdc<sup>2-</sup> ligand in YK-1.

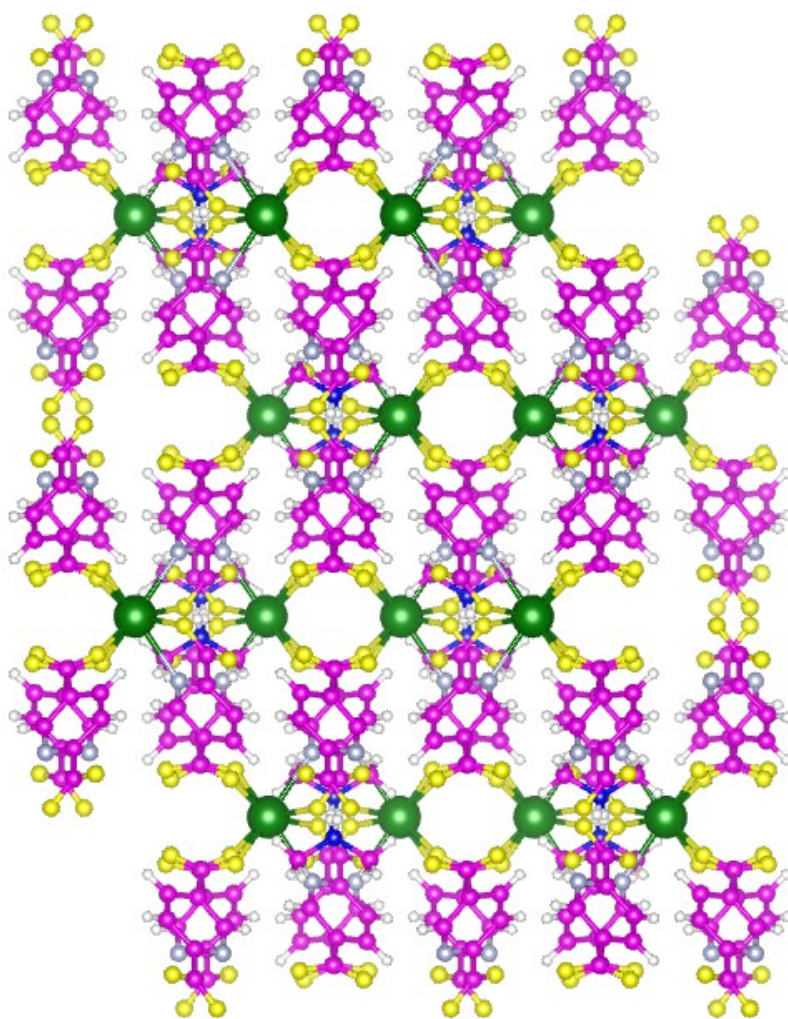

**Fig.S3.** Ball and stick model of YK-1 along a axis.

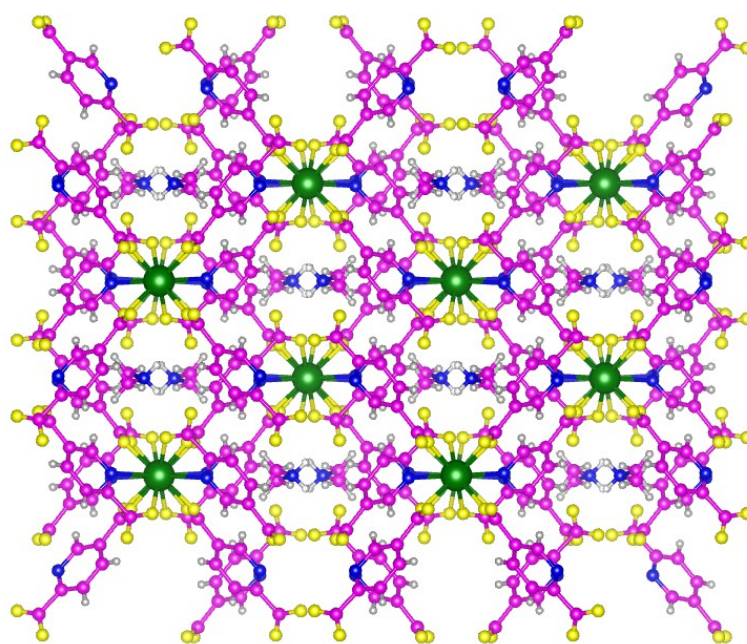

**Fig. S4.** Ball and stick model of YK-1 along b axis

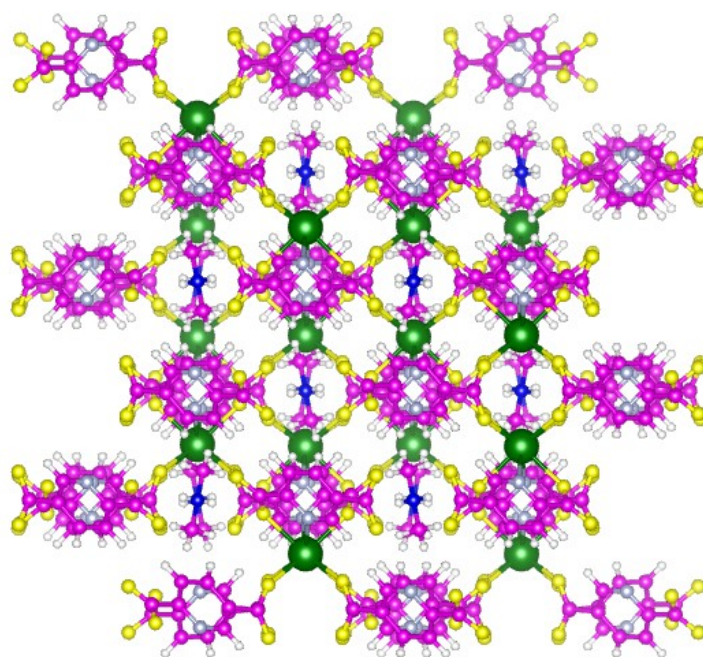

**Fig.S5.** Ball and stick model of YK-1 along c axis

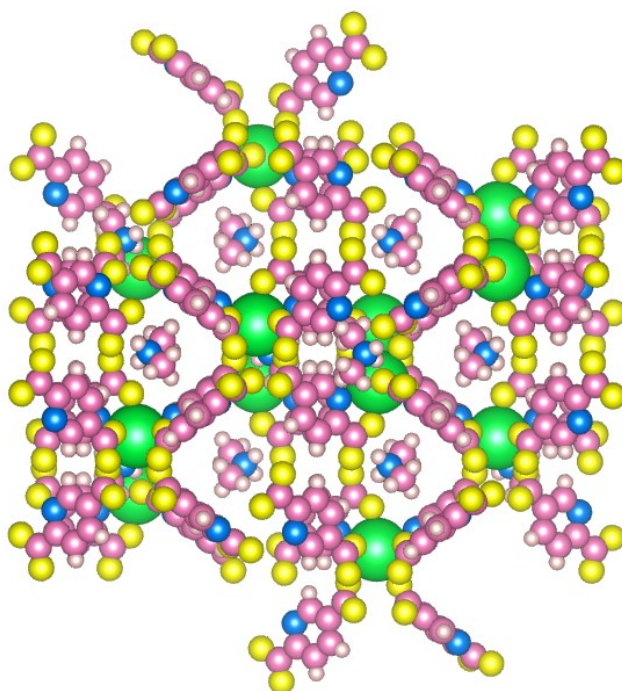

**Fig.S6.** Spacefilled model of YK-1

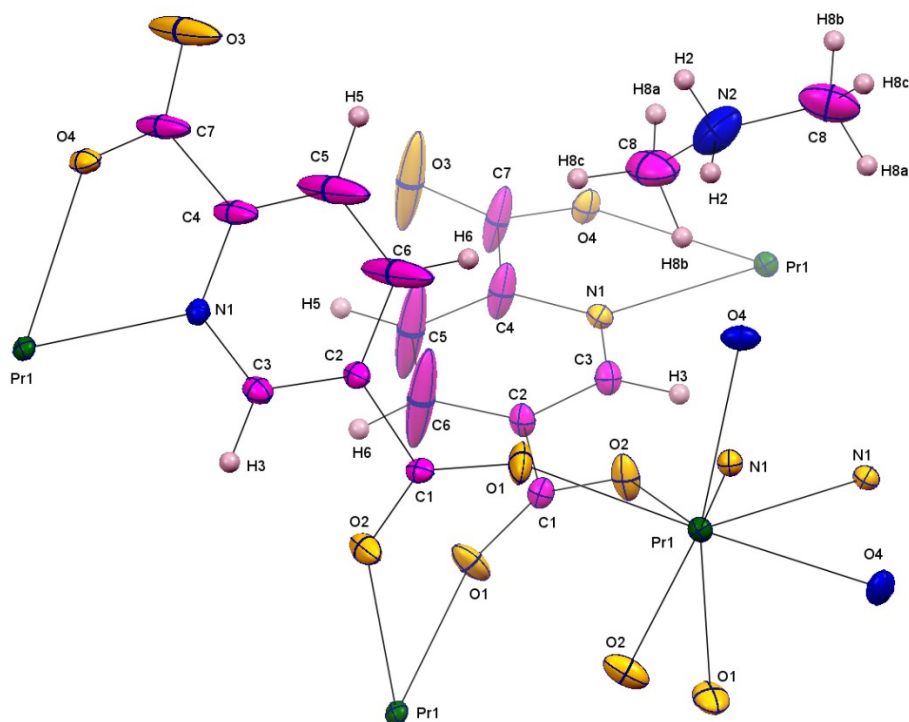

Fig. S7. Ortep view of YK-1.

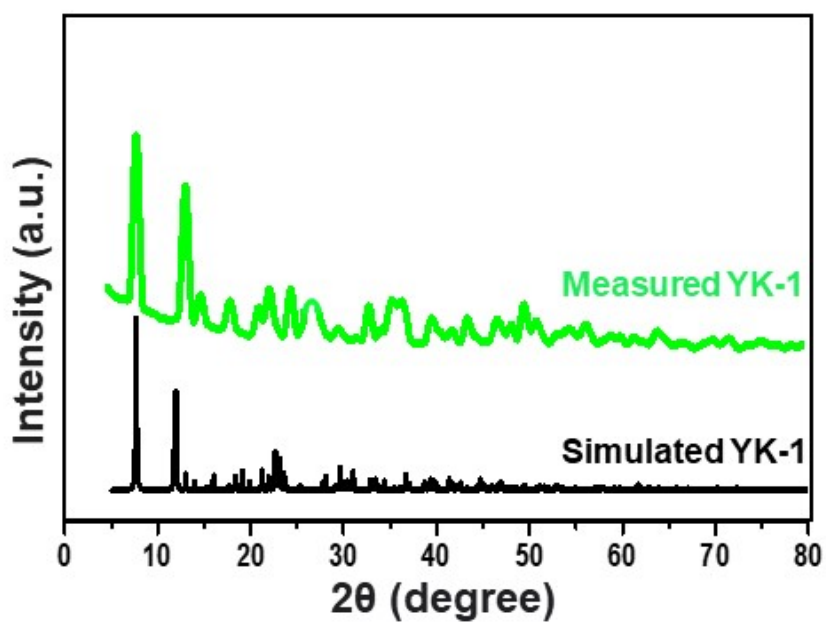

Fig. S8. PXRD images for YK-1 (observed and simulated)

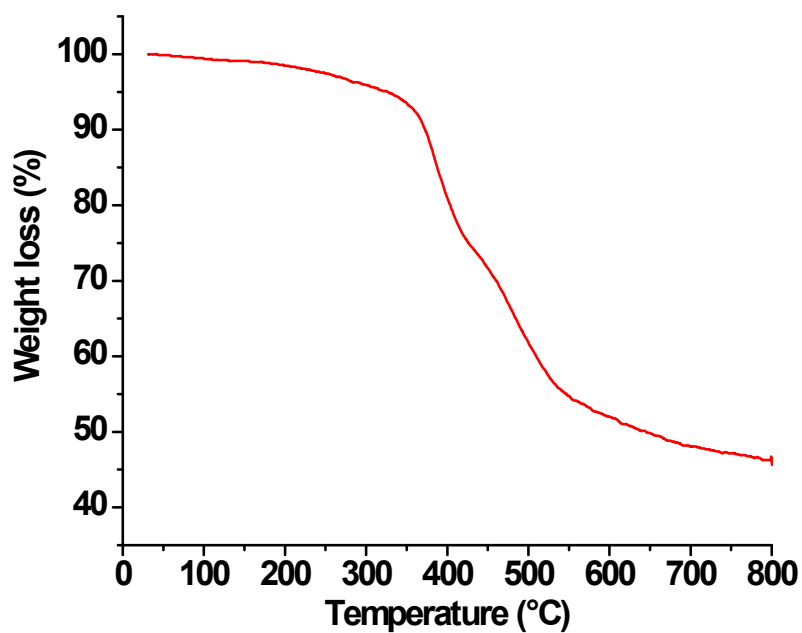

Fig. S9. TGA of YK-1

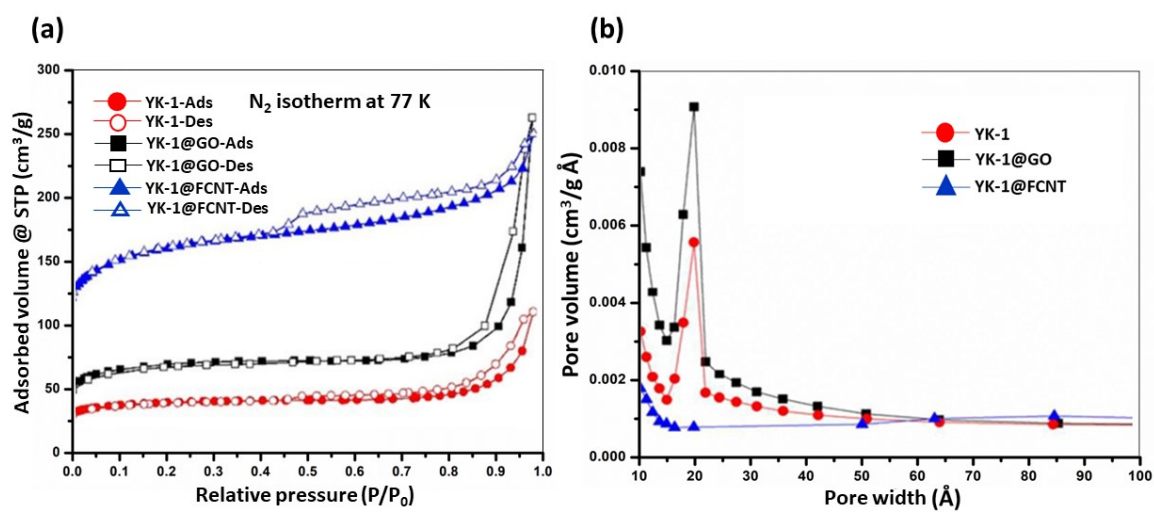

Fig

. S10. (a) Nitrogen adsorption-desorption isotherms (BET), and (b) Barrett-Joyner-Halenda (BJH) pore size distribution curves of YK-1, YK-1@GO, and YK-1@FCNT.

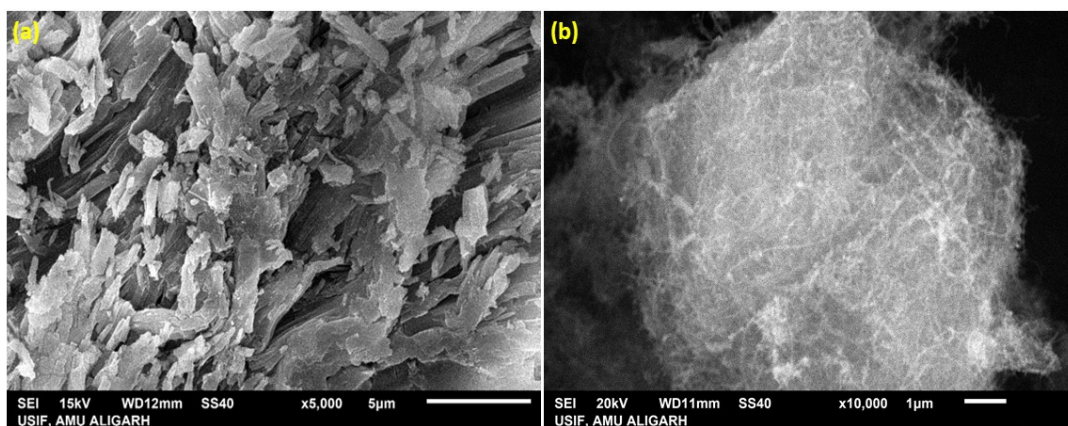

**Fig. S11.** SEM images of (a) GO and (b) FCNT.
